# Supplementary material for: Sex differences in the human brain: a roadmap for more careful analysis and interpretation of a biological reality
Source: PubMed Central journal article supplement (PMC9327177; doi:10.1186/s13293-022-00448-w), 2022-07-26
Supplement: 13293_2022_448_MOESM1_ESM.pdf [file 13293_2022_448_MOESM1_ESM.pdf]

Center-of-Mass location (mm in MNI)

| Region                    | x | y             | z     | Volume (cm3) |       |
|---------------------------|---|---------------|-------|--------------|-------|
|                           |   | Male > Female |       |              |       |
| Cerebellum_4_5_L          |   | -12.4         | -48.5 | -17.9        | 4.867 |
| Cerebellum_4_5_R          |   | 18            | -45.3 | -20.7        | 4.698 |
| Temporal_Inf_L_partition1 |   | -44           | -5.8  | -40.8        | 3.436 |
| Fusiform_R_partition1     |   | 31.5          | -21.7 | -32.2        | 3.301 |
| ParaHippocampal_R         |   | 22.7          | -10.3 | -29.7        | 2.518 |
| Cerebellum_6_R            |   | 32.2          | -47.3 | -31.9        | 2.400 |
| Vermis_4_5                |   | 2.5           | -55.5 | -11.1        | 2.373 |
| Fusiform_L_partition1     |   | -28.8         | -25.9 | -30.2        | 2.234 |
| ParaHippocampal_L         |   | -19.9         | -9.2  | -30.5        | 2.140 |
| Lingual_L_partition1      |   | -13.2         | -51.6 | -8.9         | 2.096 |
| Putamen_R                 |   | 26.1          | 4.1   | 3            | 1.931 |
| Temporal_Pole_Mid_L       |   | -45.4         | 10.6  | -35.3        | 1.681 |
| Temporal_Inf_R_partition1 |   | 42.5          | -9.2  | -41.6        | 1.374 |
| Cerebellum_6_L            |   | -23.5         | -56.8 | -28.2        | 1.235 |
| Vermis_3                  |   | 2.9           | -44.8 | -14.5        | 1.195 |
| Putamen_L                 |   | -24.7         | -0.5  | 3.4          | 1.026 |
| Cerebellum_Crus1_R        |   | 37.9          | -50.6 | -34.5        | 0.921 |
| Lingual_R_partition1      |   | 13.9          | -50.2 | -9.8         | 0.739 |
| Cerebellum_3_R            |   | 13.1          | -38.6 | -21.5        | 0.699 |
| Temporal_Mid_L            |   | -53.9         | 3     | -30.2        | 0.678 |
| Temporal_Inf_L_partition2 |   | -52.3         | -58.4 | -20.9        | 0.604 |
| Hippocampus_L             |   | -24.6         | -11.2 | -25.4        | 0.415 |
| Occipital_Inf_L           |   | -46.9         | -68.2 | -17.8        | 0.408 |
| Lingual_L_partition2      |   | -10.5         | -88.5 | -18.5        | 0.381 |
| Temporal_Pole_Sup_L       |   | -48.2         | 8.6   | -26.6        | 0.327 |
| Cerebellum_Crus1_L        |   | -42.6         | -70.1 | -22.9        | 0.263 |
| Fusiform_L_partition2     |   | -41.9         | -69.4 | -19.7        | 0.250 |
| Amygdala_L                |   | -23.3         | -3    | -26.1        | 0.246 |
| Cerebellum_3_L            |   | -8.9          | -39.7 | -19          | 0.196 |

|                           |       |       |       |       |
|---------------------------|-------|-------|-------|-------|
| Cerebellum_8_L_partition1 | -29.6 | -54.3 | -48.1 | 0.192 |
| Lingual_R_partition2      | 10.8  | -87.8 | -14.1 | 0.189 |
| Cerebellum_9_L            | -15.1 | -50.4 | -54.6 | 0.179 |
| Temporal_Inf_R_partition2 | 51.3  | -58.2 | -20.9 | 0.179 |
| Precuneus_L               | -9.8  | -48.4 | 2.8   | 0.172 |
| Calcarine_L               | -4.6  | -91.2 | -15.5 | 0.165 |
| Hippocampus_R             | 30.7  | -13.3 | -27.3 | 0.162 |
| Cerebellum_8_R            | 22.4  | -64.9 | -44.1 | 0.128 |
| Amygdala_R                | 25.8  | -0.8  | -25.3 | 0.122 |
| Temporal_Pole_Mid_R       | 25.1  | -0.5  | -37.1 | 0.111 |
| Cerebellum_8_L_partition2 | -17.5 | -51   | -59   | 0.108 |
| Fusiform_R_partition2     | 43.9  | -67.2 | -19.7 | 0.078 |
| <b>Female &gt; Male</b>   |       |       |       |       |
| Cingulum_Ant_L            | -4.5  | 39.5  | 7.2   | 4.958 |
| Cingulum_Ant_R            | 7.5   | 38.8  | 12.4  | 4.455 |
| Frontal_Inf_Tri_L         | -43.1 | 28.6  | 19.1  | 3.517 |
| Frontal_Medial_Orb_R      | 5.2   | 40.6  | -10.5 | 3.311 |
| Frontal_Inf_Tri_R         | 44.3  | 29.9  | 17.9  | 2.994 |
| Cingulum_Mid_R            | 6.9   | 19.8  | 34.9  | 2.744 |
| Occipital_Mid_L           | -28.9 | -76.7 | 25.3  | 2.103 |
| Frontal_Medial_Orb_L      | -5.2  | 40    | -12.7 | 1.981 |
| Parietal_Inf_L_partition1 | -31.9 | -57.1 | 41.1  | 1.772 |
| Rectus_R                  | 4.8   | 35.9  | -20.5 | 1.758 |
| Frontal_Mid_R_partition1  | 42.1  | 42    | 12    | 1.677 |
| Insula_R                  | 37.5  | -18.2 | 7.4   | 1.647 |
| Rectus_L                  | -4.2  | 34.4  | -20.3 | 1.569 |
| Rolandic_Oper_R           | 45.5  | -23.5 | 18.5  | 1.519 |
| Parietal_Inf_R            | 36.2  | -42.7 | 44.4  | 1.448 |
| Cingulum_Mid_L_partition1 | -0.8  | 12.5  | 38    | 1.232 |
| Frontal_Sup_Medial_L      | -7.6  | 41.1  | 16.7  | 1.151 |
| Frontal_Mid_L             | -43.8 | 29.4  | 24.7  | 1.083 |

|                              |       |       |       |       |
|------------------------------|-------|-------|-------|-------|
| Postcentral_R                | 41.7  | -26.6 | 42    | 1.046 |
| Occipital_Sup_L              | -24.2 | -77.7 | 26.3  | 1.040 |
| Temporal_Sup_R_partition1    | 48.7  | -23.5 | 8.9   | 0.965 |
| Frontal_Inf_Orb_R_partition1 | 23.7  | 25.2  | -19   | 0.891 |
| Insula_L                     | -38   | -17.1 | 5     | 0.854 |
| Frontal_Sup_Medial_R         | 8     | 47.9  | 2.1   | 0.813 |
| Parietal_Sup_L               | -26.2 | -63.4 | 40.6  | 0.776 |
| Angular_R                    | 35.1  | -55.6 | 42.6  | 0.692 |
| SupraMarginal_R_partition1   | 55.8  | -23.7 | 22.1  | 0.655 |
| Frontal_Sup_Orb_R            | 18.3  | 26.7  | -19.2 | 0.628 |
| Frontal_Inf_Orb_L            | -21.9 | 23.5  | -18.2 | 0.601 |
| Frontal_Inf_Oper_R           | 42.6  | 18.1  | 28.7  | 0.594 |
| Supp_Motor_Area_L            | -1.8  | -4.5  | 47.2  | 0.543 |
| SupraMarginal_R_partition2   | 41    | -32.5 | 40    | 0.483 |
| Frontal_Inf_Orb_R_partition2 | 43.2  | 40.2  | -14.3 | 0.469 |
| Parietal_Inf_L_partition2    | -37.2 | -37.9 | 40.9  | 0.415 |
| Frontal_Inf_Oper_L           | -43   | 17.7  | 29    | 0.378 |
| Supp_Motor_Area_R_partition1 | 4     | -2.5  | 45.8  | 0.375 |
| Postcentral_L                | -35.9 | -36.1 | 41.7  | 0.365 |
| Occipital_Mid_R              | 30.6  | -71.9 | 27.4  | 0.354 |
| Precuneus_L                  | -1    | -67.1 | 41.3  | 0.317 |
| Temporal_Sup_L               | -42.2 | -17.1 | -3.2  | 0.314 |
| Temporal_Sup_R_partition2    | 46.9  | -37.1 | 10.7  | 0.270 |
| Heschl_R                     | 40.5  | -20   | 6.2   | 0.263 |
| Frontal_Mid_Orb_R_partition1 | 24    | 35    | -18.6 | 0.203 |
| Frontal_Mid_Orb_L            | -20.4 | 29.2  | -19.1 | 0.192 |
| Thalamus_L                   | -3.8  | -11.4 | 8.9   | 0.179 |
| Caudate_R                    | 9.3   | 16.6  | 5.3   | 0.176 |
| Parietal_Sup_R               | 31.7  | -46.2 | 44.3  | 0.169 |
| Frontal_Mid_Orb_R_partition2 | 31.6  | 52.9  | -4.3  | 0.162 |
| Cingulum_Mid_L_partition2    | -11.5 | -37.2 | 43.9  | 0.118 |

|                              |      |      |      |       |
|------------------------------|------|------|------|-------|
| Frontal_Mid_R_partition2     | 32.4 | 52.2 | -1.5 | 0.078 |
| Supp_Motor_Area_R_partition2 | 10.7 | 0.5  | 48   | 0.071 |
