# Supplementary material for: Sex differences in the human brain: a roadmap for more careful analysis and interpretation of a biological reality
Source: PubMed Central journal article supplement (PMC9327177; doi:10.1186/s13293-022-00448-w), 2022-07-26
Supplement: 13293_2022_448_MOESM2_ESM.pdf [file 13293_2022_448_MOESM2_ESM.pdf]

### Center-of-Mass location (mm in MNI)

| Region                        | x     | y     | z     | Volume (cm3) |
|-------------------------------|-------|-------|-------|--------------|
| Occipital_Mid_L               | -31.3 | -93.4 | 0.2   | 2.136        |
| Occipital_Mid_R               | 35.9  | -89.1 | 4.3   | 1.198        |
| Cerebellum_Crus2_R_partition1 | 37    | -69.9 | -41.5 | 1.002        |
| Cerebellum_8_R                | 20    | -73.7 | -52.9 | 0.577        |
| Frontal_Sup_R                 | 29.8  | 0.1   | 62.3  | 0.543        |
| Cerebellum_Crus1_R            | 33.6  | -71.6 | -37.7 | 0.513        |
| Thalamus_R                    | 7.2   | -23.7 | 4.1   | 0.476        |
| Cerebellum_Crus2_L_partition1 | -29.7 | -74.2 | -40.5 | 0.395        |
| Cerebellum_7b_R               | 17.9  | -78.2 | -50.3 | 0.250        |
| Occipital_Inf_L               | -26.8 | -91.6 | -8    | 0.203        |
| Cerebellum_Crus1_L            | -27.5 | -74   | -38.6 | 0.196        |
| Cerebellum_7b_L               | -17.2 | -74.6 | -49.2 | 0.176        |
| Calcarine_L                   | 0.5   | -87.3 | -7.1  | 0.132        |
| Calcarine_R                   | 22.3  | -93.4 | -1.2  | 0.132        |
| Cerebellum_Crus2_L_partition2 | -16.5 | -79.1 | -49   | 0.095        |
| Temporal_Pole_Sup_L           | -35.6 | 17.6  | -28.4 | 0.088        |
| Precentral_R                  | 28    | -10.2 | 64.2  | 0.081        |
| Cerebellum_Crus2_R_partition2 | 15.5  | -80.8 | -48.7 | 0.074        |
